# Supplementary material
Source: Springer Nature journal article supplement (https://www.springermedizin.de/resource/supplementary/13063_2013_2028_MOESM1_ESM.pdf/9621208)
Supplement: MOESM1 [file 9621208]

**List of approvals from ethical bodies at all institutions**

| <b>Institution</b>                                                                                                   | <b>Status</b>            | <b>Justification</b>                                                                                                                                                                                                                                                |
|----------------------------------------------------------------------------------------------------------------------|--------------------------|---------------------------------------------------------------------------------------------------------------------------------------------------------------------------------------------------------------------------------------------------------------------|
| <b>Icahn School of Medicine at Mount Sinai –</b><br>Institutional Review Board (IRB)                                 | Approved                 | Most recent annual approval was obtained in April 2013. Renewal application has been submitted and approval is expected.                                                                                                                                            |
| <b>Moi Teaching and Referral Hospital and Moi University –</b><br>Institutional Research and Ethics Committee (IREC) | Approved                 | Most recent annual approval was obtained in March 2014.                                                                                                                                                                                                             |
| <b>Duke University –</b><br>Duke University Health System Institutional Review Board (DUHS IRB)                      | Exempt from IRB approval | DUHS IRB determined that, for Duke investigators, the study protocol meets the definition of research not involving human subjects as described in 45 CFR46.102(f), 21 CFR 56.102€ and 21 CFR 812.3(p) and satisfies the Privacy Rule as described in 45CFR164.514. |
| <b>Brown University –</b><br>Institutional Review Board (Brown IRB)                                                  | Exempt from IRB approval | Brown University has deferred to the Mount Sinai IRB for review and continuing oversight of the human subjects research for this protocol.                                                                                                                          |
| <b>Indiana University –</b><br>Institutional Review Board (IU IRB)                                                   | Exempt from IRB approval | IU has deferred to the Mount Sinai IRB for review and continuing oversight of the human subjects research for this protocol.                                                                                                                                        |
